# Supplementary material for: Senescence-associated ultrastructural features of long-term cultures of induced pluripotent stem cells (iPSCs)
Source: publisher site journal article supplement (doi:10.18632/aging.101309), 2017-10-23
Supplement: Supplementary file [file aging-v9i10-101309-supplementary-material-SD1.pdf]

## SUPPLEMENTARY MATERIAL

### Supplementary experimental procedures

#### Analyses of the fluorescence intensity

The mean pixel values (as an indication of the fluorescence intensity) were measured from at least five images (including from ~70 to ~200 cells) for each antibody. Images (obtained using TCS-SP8X laser-scanning confocal microscope, Leica Microsystems, Mannheim, Germany) were uploaded to ImageJ

and the intensity of fluorescence for each image was converted to a single numeric value using the RGB color model. Individual red, green and blue (RGB) values were generated for each image using ImageJ and then converted to a singular gray scale value. The resulting gray scale value represents overall intensity (Solomon C, Breckon T. Fundamentals of digital image processing: a practical approach with example in Matlab. Chichester, U.K.: Wiley-Blackwell, 2011). The mean pixel value was obtained by analyzing five images for each sample, having from 70 to 200 cells per image.

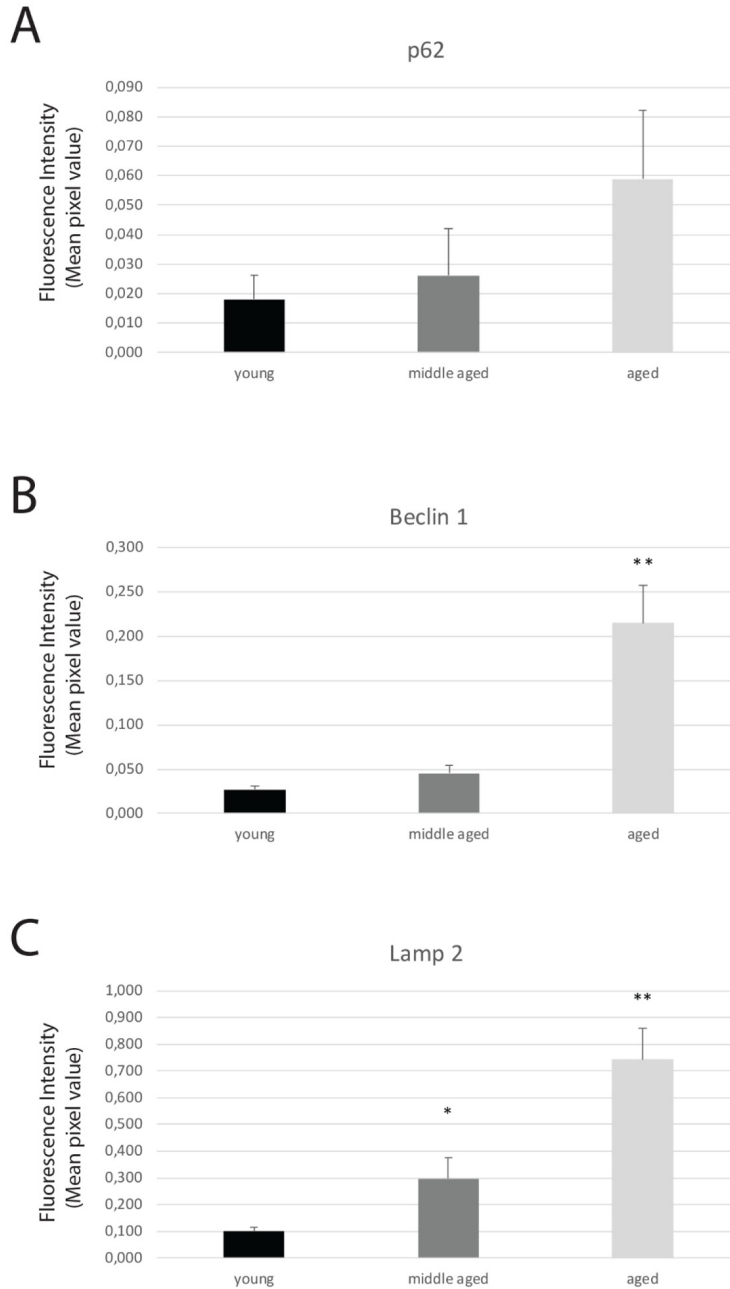

**Supplementary Figure 1.** Mean pixel value for p62 (A), Beclin 1 (B) and Lamp 2 (C). The y axis represents the grayscale value of the signal measured from the immunofluorescence image (obtained with Leica confocal microscope).
